# Supplementary figures and images for: Hepatocyte-Specific Fads1 Overexpression Attenuates Western Diet-Induced Metabolic Phenotypes in a Rat Model
Source: MDPI journal article supplement (doi:10.3390/ijms25094836), 2024-04-29

Figure S1

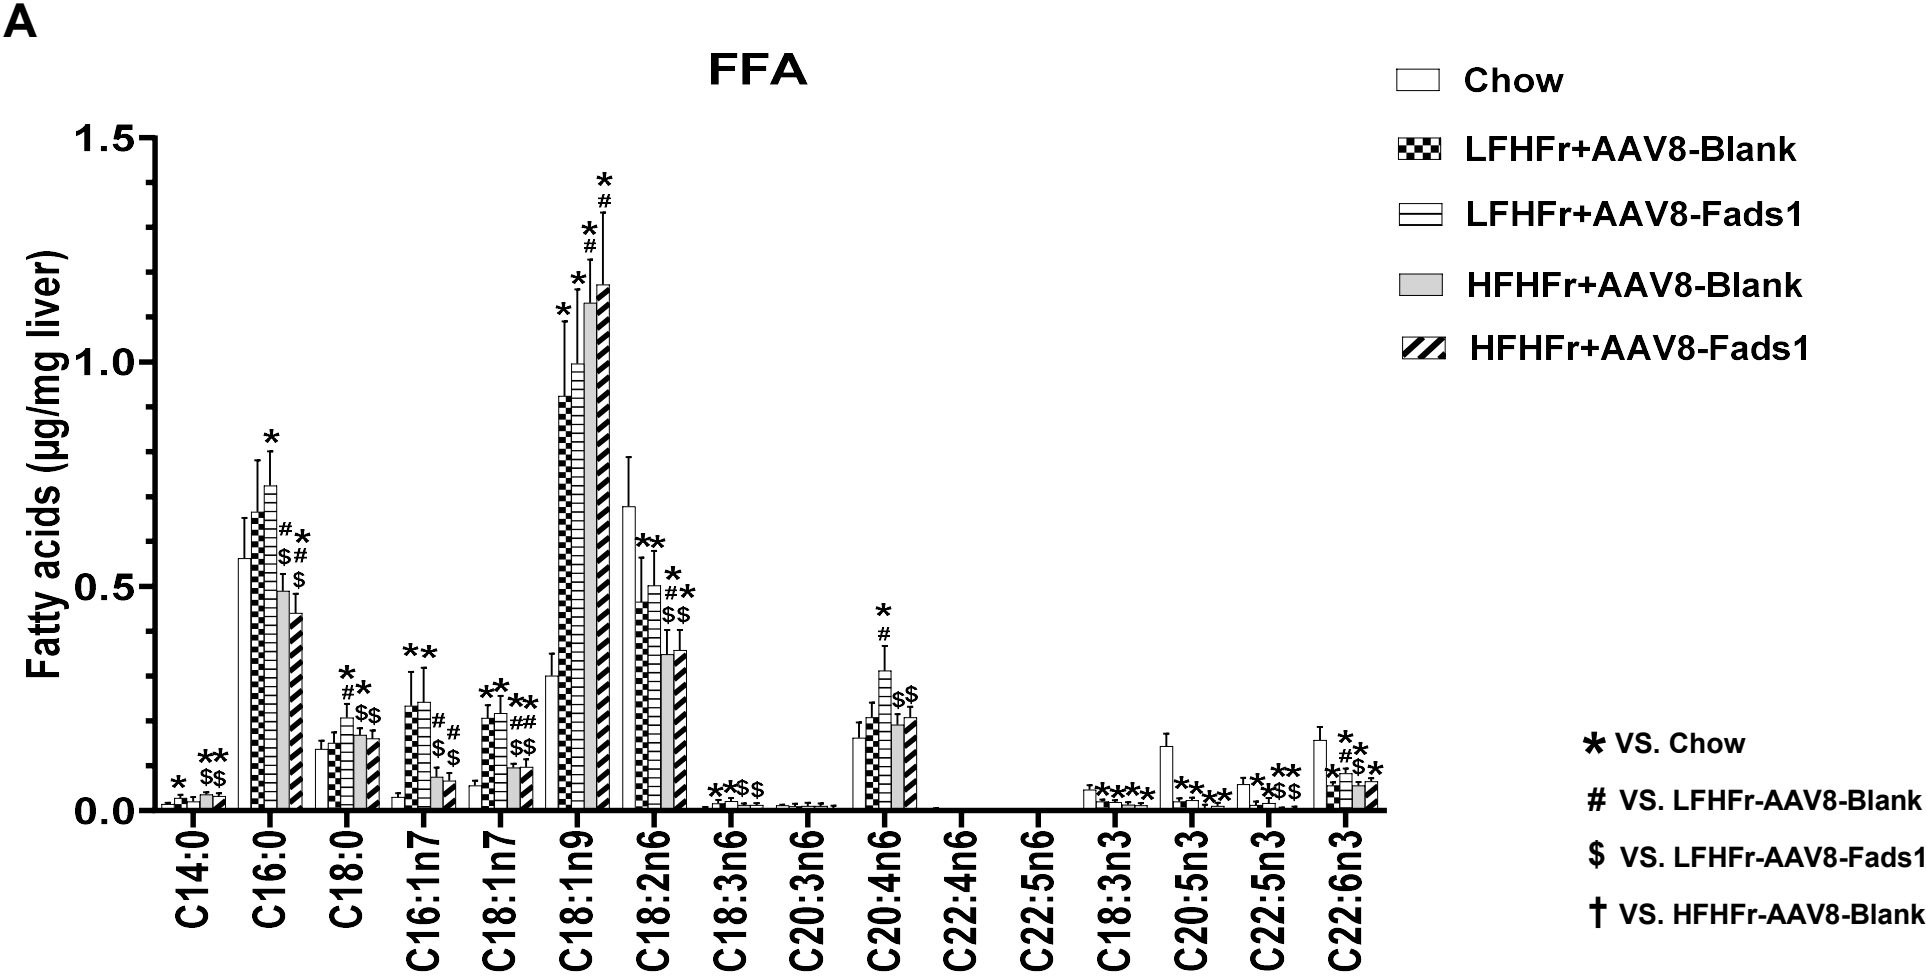

## Fatty acids ( $\mu\text{g}/\text{mg}$ liver)

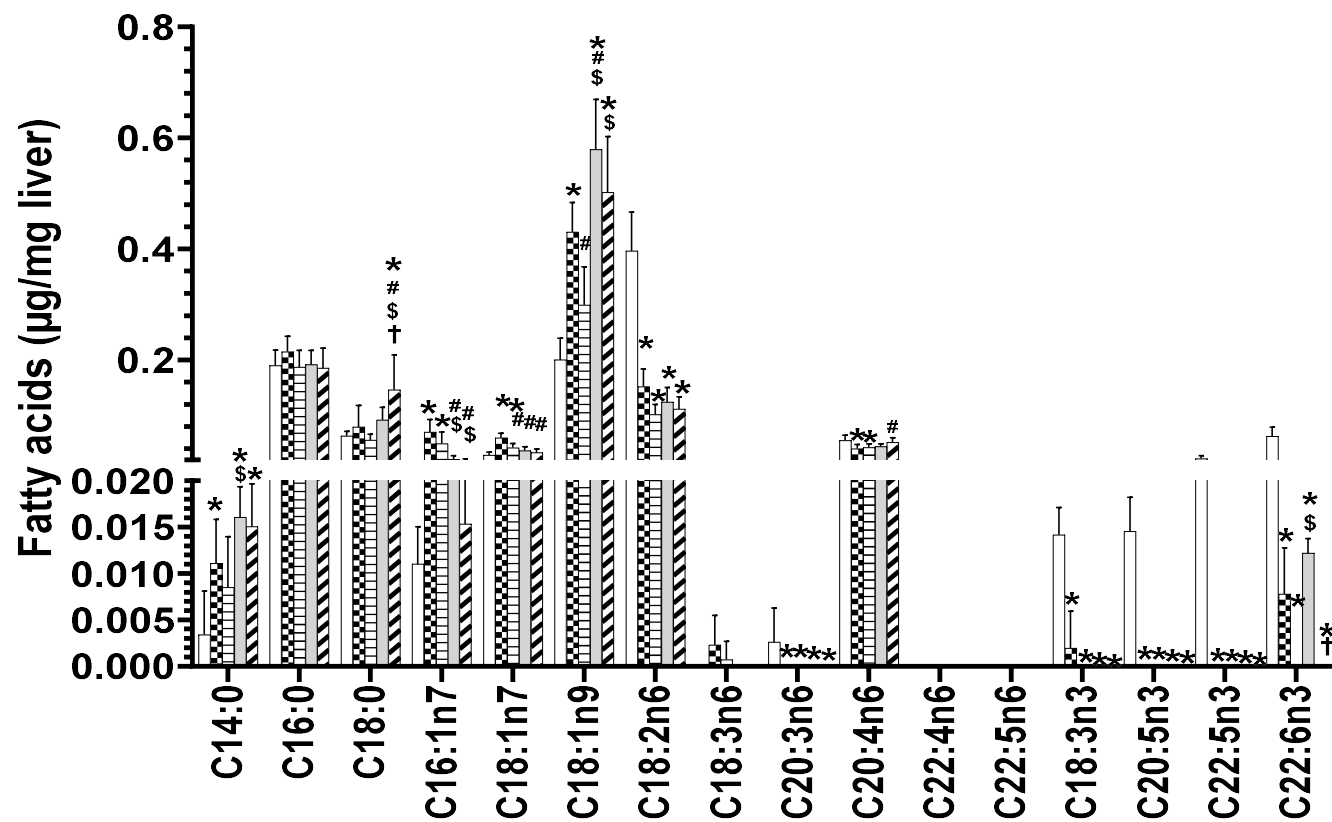

C

TAG

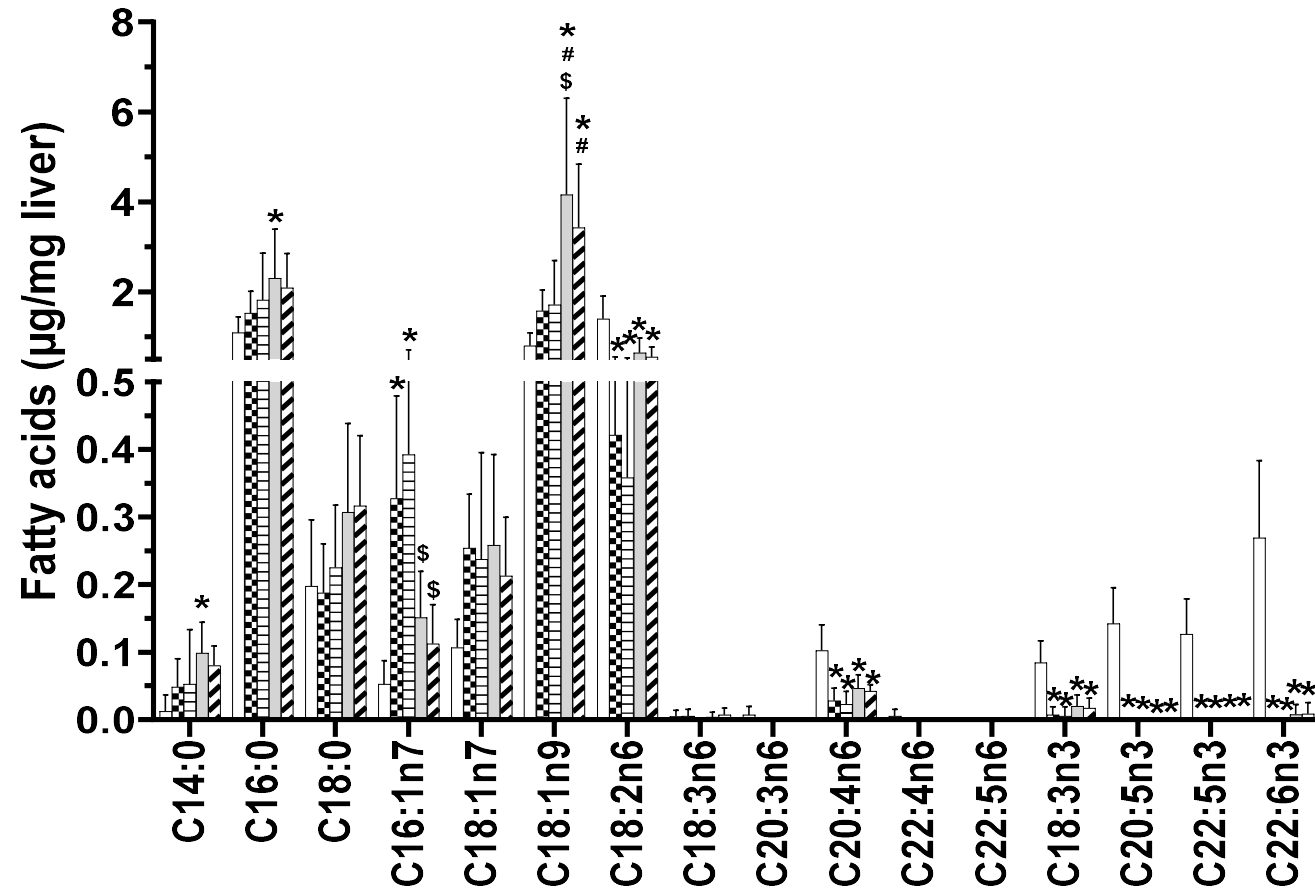

D

PL

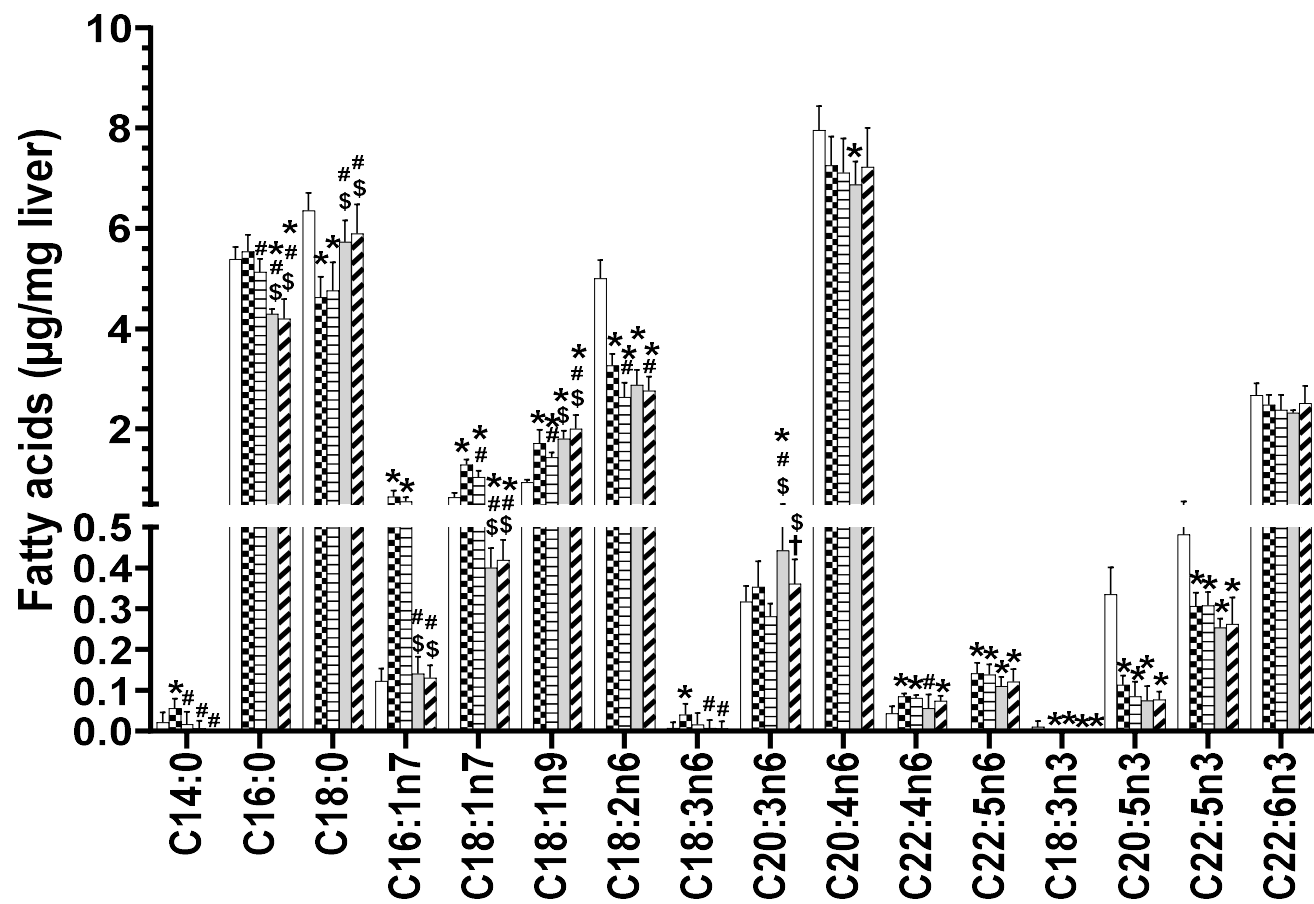

E

CE

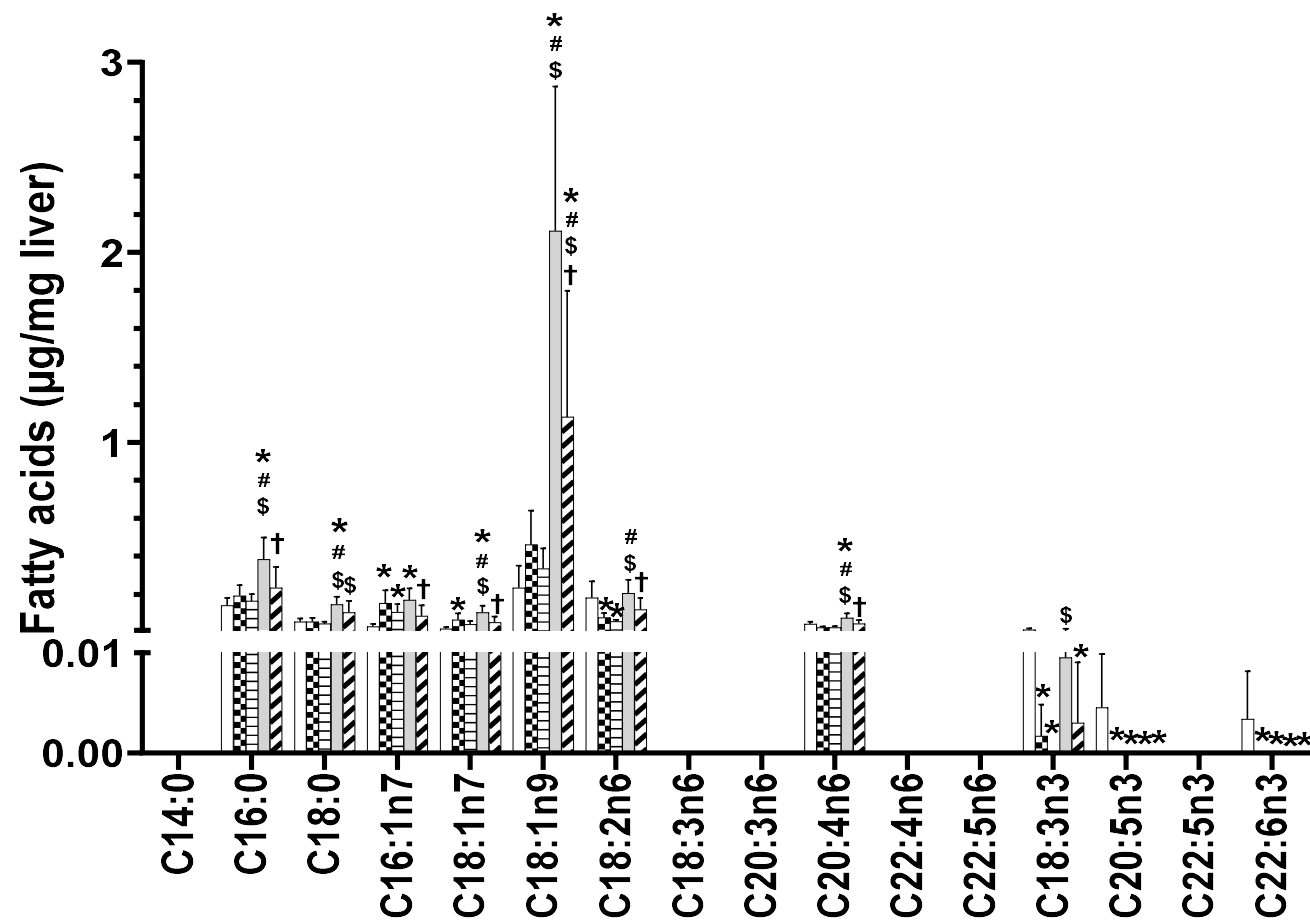

Supplement: s1 [file s1]
